# Supplementary material
Source: publisher figshare collection journal article supplement (https://tandf.figshare.com/ndownloader/files/28850642)
Supplement: Supplementary file 1 [file 28850642]

## Table S1 Petrography for the late Permian-middle Triassic intermediate-acid intrusive rocks in the EKOB

| **Area** | **Rock type** | **Wall-rock** | **Form** | **Texture** | **Major minerals** | | | | | | | | | | **Accessory minerals** | | **Description** |
| --- | --- | --- | --- | --- | --- | --- | --- | --- | --- | --- | --- | --- | --- | --- | --- | --- | --- |
| **Quartz** | | **Plagioclase** | | **K-feldspar** | | **amphibole** | | **biotite** | |
| **vol. (%)** | **size (mm)** | **vol. (%)** | **size (mm)** | **vol. (%)** | **size (mm)** | **vol. (%)** | **size (mm)** | **vol. (%)** | **size (mm)** | **Minerals** | **vol. (%)** |
| Kaerqueka | Diorite | Jinshuikou Group gneiss | Batholith | Fine grained, massive texture | 10–15 | 0.5–0.8 | 40–50 | 1–1.5 | 2–5 | 0.5–0.8 | 30–40 | 2–3 | 5–10 | 0.5–1.0 | Apatite, zircon | 1–2 |  |
| Hureguolegou | Monzogranite | Diorite and Jinshuikou Group gneiss | Apophyse or dyke | Grained, massive texture | 40–50 | 0.5–1.0 | 20–25 | 0.8–1.2 | 25–30 | 0.5–1.2 |  |  | 2–5 | 0.2–0.5 | Apatite, zircon | 1–2 |  |
| Dongdakende | Diorite | Pre-Mesozoic strata or igneous rocks | Laccolith | Fine grained, massive texture | 20–25 | 0.5–1.0 | 40–50 | 1.0–2.0 | 2–5 | 0.5–1.0 | 5–10 | 0.2–0.5 | 15–20 | 0.5–1.0 | Apatite, zircon | 1–2 |  |
| Boluogaxiong | Granodiorite | Jinshuikou Group gneiss | Batholith | Grained , massive texture | 20–30 | 0.8–2.0 | 35–50 | 1.0–5.0 | 5–15 | 1.0–1.5 | 5–15 | 0.5–0.8 | 5–10 | 0.5–1.2 | Apatite, zircon | 1–2 |  |
| Boluogaxiong | Diorite porphyry | Granodiorite | Dyke | Porphyritic, massive texture |  |  | 10–20 | 1.0–2.0 |  |  | 5–10 | 0.5–1.0 | 5–10 | 0.5–1.0 | Apatite, zircon | 1–2 | Phenocrysts (30–40 %), groundmass (60–70 %) |
| Langmuri | Monzogranite | Jinshuikou Group gneiss | Laccolith | Grained, massive texture | 20–25 | 1.0–2.0 | 25–35 | 0.5–2.0 | 35–45 | 0.5–2.0 |  |  | 5–8 | 0.4–0.8 | Apatite, zircon | 1–2 |  |

## Table S2 Zircon LA-ICP-MS U-Pb dating data for the late Permian-middle Triassic intermediate-acid intrusive rocks in the EKOB

| **Analysis spot** | **Rock type** | **Th** | **U** | **Pb** | **Th/U** | **207Pb/206Pb** | | **207Pb/235U** | | **206Pb/238U** | | **207Pb/206Pb** | | **207Pb/235U** | | **206Pb/238U** | |
| --- | --- | --- | --- | --- | --- | --- | --- | --- | --- | --- | --- | --- | --- | --- | --- | --- | --- |
| **ppm** | **ppm** | **ppm** | **Ratio** | **1sigma** | **Ratio** | **1sigma** | **Ratio** | **1sigma** | **Age (Ma)** | **1sigma** | **Age (Ma)** | **1sigma** | **Age (Ma)** | **1sigma** |
| KEQK-N1-01 | Diorite | 152 | 176 | 143 | 0.87 | 0.05141 | 0.00198 | 0.27168 | 0.00987 | 0.03832 | 0.00017 | 261 | 89 | 244 | 8 | 242 | 1 |
| KEQK-N1-02 | 218 | 326 | 160 | 0.67 | 0.05060 | 0.00021 | 0.26648 | 0.00766 | 0.03819 | 0.00124 | 233 | 9 | 240 | 6 | 242 | 5 |
| KEQK-N1-03 | 310 | 441 | 274 | 0.70 | 0.05204 | 0.00102 | 0.27712 | 0.00596 | 0.03862 | 0.00060 | 287 | 44 | 248 | 5 | 244 | 4 |
| KEQK-N1-04 | 139 | 245 | 157 | 0.57 | 0.05128 | 0.00148 | 0.27084 | 0.01040 | 0.03828 | 0.00046 | 254 | 65 | 243 | 8 | 242 | 3 |
| KEQK-N1-05 | 186 | 271 | 179 | 0.68 | 0.05129 | 0.00349 | 0.26991 | 0.01506 | 0.03822 | 0.00048 | 254 | 183 | 243 | 12 | 242 | 3 |
| KEQK-N1-06 | 312 | 431 | 281 | 0.73 | 0.05174 | 0.00163 | 0.27463 | 0.00439 | 0.03851 | 0.00062 | 272 | 74 | 246 | 3 | 244 | 4 |
| KEQK-N1-07 | 275 | 300 | 213 | 0.92 | 0.05250 | 0.00028 | 0.27838 | 0.00219 | 0.03844 | 0.00022 | 306 | 13 | 249 | 2 | 243 | 1 |
| KEQK-N1-08 | 222 | 266 | 162 | 0.84 | 0.05280 | 0.00027 | 0.27904 | 0.00243 | 0.03833 | 0.00029 | 320 | 11 | 250 | 2 | 242 | 2 |
| KEQK-N1-09 | 516 | 564 | 391 | 0.92 | 0.05158 | 0.00017 | 0.27398 | 0.00160 | 0.03851 | 0.00018 | 333 | 7 | 246 | 1 | 244 | 1 |
| KEQK-N1-10 | 78 | 87 | 64 | 0.90 | 0.05068 | 0.00224 | 0.26811 | 0.00696 | 0.03839 | 0.00071 | 233 | 102 | 241 | 6 | 243 | 4 |
| KEQK-N1-11 | 176 | 224 | 128 | 0.78 | 0.05278 | 0.00024 | 0.27829 | 0.00268 | 0.03825 | 0.00034 | 320 | 11 | 249 | 2 | 242 | 2 |
| KEQK-N1-12 | 274 | 347 | 208 | 0.79 | 0.05221 | 0.00023 | 0.27802 | 0.00257 | 0.03859 | 0.00030 | 295 | 11 | 249 | 2 | 244 | 2 |
| KEQK-N1-13 | 242 | 316 | 173 | 0.77 | 0.05285 | 0.00026 | 0.27885 | 0.00204 | 0.03829 | 0.00027 | 320 | 18 | 250 | 2 | 242 | 2 |
| KEQK-N1-14 | 253 | 304 | 162 | 0.83 | 0.05190 | 0.00095 | 0.27590 | 0.00412 | 0.03854 | 0.00020 | 280 | 43 | 247 | 3 | 244 | 1 |
| KEQK-N1-15 | 473 | 548 | 328 | 0.86 | 0.05176 | 0.00018 | 0.27304 | 0.00148 | 0.03825 | 0.00018 | 276 | 25 | 245 | 1 | 242 | 1 |
| KEQK-N1-16 | 202 | 220 | 108 | 0.92 | 0.05102 | 0.00320 | 0.26825 | 0.01588 | 0.03812 | 0.00019 | 243 | 144 | 241 | 13 | 241 | 1 |
| KEQK-N1-17 | 283 | 276 | 195 | 1.03 | 0.05286 | 0.00026 | 0.27882 | 0.00190 | 0.03825 | 0.00021 | 324 | 11 | 250 | 2 | 242 | 1 |
| KEQK-N1-18 | 575 | 548 | 361 | 1.05 | 0.05169 | 0.00036 | 0.27319 | 0.00157 | 0.03831 | 0.00015 | 272 | 15 | 245 | 1 | 242 | 1 |
| KEQK-N1-19 | 234 | 255 | 166 | 0.92 | 0.05276 | 0.00025 | 0.27885 | 0.00213 | 0.03833 | 0.00025 | 317 | 9 | 250 | 2 | 242 | 2 |
| KEQK-N1-20 | 273 | 291 | 185 | 0.94 | 0.05217 | 0.00035 | 0.27710 | 0.00259 | 0.03851 | 0.00025 | 300 | 17 | 248 | 2 | 244 | 2 |
| HRGLG-N1-01 | Monzogranite | 1330 | 4954 | 234 | 0.27 | 0.05138 | 0.00205 | 0.27964 | 0.01120 | 0.03924 | 0.00064 | 257 | 91 | 250 | 9 | 248 | 4 |
| HRGLG-N1-02 | 1460 | 4145 | 229 | 0.35 | 0.05628 | 0.00338 | 0.30745 | 0.01598 | 0.03946 | 0.00082 | 465 | 133 | 272 | 12 | 249 | 5 |
| HRGLG-N1-03 | 1773 | 4211 | 234 | 0.42 | 0.04995 | 0.00171 | 0.27949 | 0.00928 | 0.04017 | 0.00042 | 195 | 106 | 250 | 7 | 254 | 3 |
| HRGLG-N1-04 | 282 | 526 | 42 | 0.54 | 0.04924 | 0.00399 | 0.26930 | 0.02080 | 0.03969 | 0.00072 | 167 | 172 | 242 | 17 | 251 | 4 |
| HRGLG-N1-05 | 250 | 461 | 40 | 0.54 | 0.05590 | 0.00736 | 0.29532 | 0.03674 | 0.03950 | 0.00122 | 456 | 296 | 263 | 29 | 250 | 8 |
| HRGLG-N1-06 | 201 | 385 | 30 | 0.52 | 0.05663 | 0.00382 | 0.30145 | 0.02010 | 0.03961 | 0.00078 | 476 | 150 | 268 | 16 | 250 | 5 |
| HRGLG-N1-07 | 202 | 401 | 30 | 0.50 | 0.04817 | 0.00664 | 0.25175 | 0.03143 | 0.03892 | 0.00118 | 109 | 296 | 228 | 25 | 246 | 7 |
| HRGLG-N1-08 | 408 | 533 | 57 | 0.76 | 0.05924 | 0.00507 | 0.32723 | 0.02833 | 0.03975 | 0.00090 | 576 | 181 | 287 | 22 | 251 | 6 |
| HRGLG-N1-09 | 1706 | 2351 | 217 | 0.73 | 0.05145 | 0.00325 | 0.28016 | 0.01678 | 0.03907 | 0.00058 | 261 | 179 | 251 | 13 | 247 | 4 |
| HRGLG-N1-10 | 216 | 310 | 25 | 0.70 | 0.05469 | 0.01259 | 0.31530 | 0.07698 | 0.04030 | 0.00148 | 398 | 457 | 278 | 59 | 255 | 9 |
| HRGLG-N1-11 | 299 | 421 | 36 | 0.71 | 0.05392 | 0.00808 | 0.29572 | 0.03987 | 0.03955 | 0.00143 | 369 | 307 | 263 | 31 | 250 | 9 |
| HRGLG-N1-12 | 263 | 520 | 38 | 0.51 | 0.05229 | 0.00347 | 0.28063 | 0.01780 | 0.03973 | 0.00061 | 298 | 152 | 251 | 14 | 251 | 4 |
| HRGLG-N1-13 | 158 | 323 | 24 | 0.49 | 0.05508 | 0.00461 | 0.29604 | 0.02279 | 0.04018 | 0.00073 | 417 | 187 | 263 | 18 | 254 | 5 |
| HRGLG-N1-14 | 271 | 406 | 33 | 0.67 | 0.05375 | 0.00389 | 0.28528 | 0.01908 | 0.03944 | 0.00077 | 361 | 165 | 255 | 15 | 249 | 5 |
| HRGLG-N1-15 | 87 | 215 | 14 | 0.40 | 0.06247 | 0.00591 | 0.32991 | 0.02736 | 0.04051 | 0.00102 | 700 | 202 | 289 | 21 | 256 | 6 |
| HRGLG-N1-16 | 321 | 698 | 47 | 0.46 | 0.05278 | 0.00347 | 0.28535 | 0.01756 | 0.03958 | 0.00060 | 320 | 150 | 255 | 14 | 250 | 4 |
| HRGLG-N1-17 | 285 | 594 | 44 | 0.48 | 0.05481 | 0.00384 | 0.29439 | 0.01984 | 0.03909 | 0.00059 | 406 | 157 | 262 | 16 | 247 | 4 |
| HRGLG-N1-18 | 1159 | 1843 | 154 | 0.63 | 0.05303 | 0.00553 | 0.28584 | 0.02582 | 0.03937 | 0.00099 | 332 | 237 | 255 | 20 | 249 | 6 |
| HRGLG-N1-19 | 1135 | 2331 | 166 | 0.49 | 0.05040 | 0.00174 | 0.27916 | 0.00964 | 0.03983 | 0.00050 | 213 | 84 | 250 | 8 | 252 | 3 |
| HRGLG-N1-20 | 373 | 858 | 61 | 0.43 | 0.04891 | 0.00625 | 0.26306 | 0.03399 | 0.03927 | 0.00168 | 143 | 278 | 237 | 27 | 248 | 8 |
| HRGLG-N1-21 | 186 | 377 | 28 | 0.49 | 0.05052 | 0.00365 | 0.27046 | 0.01775 | 0.03965 | 0.00074 | 220 | 173 | 243 | 14 | 251 | 5 |
| HRGLG-N1-22 | 952 | 1388 | 106 | 0.69 | 0.04751 | 0.00279 | 0.25785 | 0.01552 | 0.03923 | 0.00067 | 76 | 133 | 233 | 13 | 248 | 4 |
| HRGLG-N1-23 | 218 | 432 | 33 | 0.51 | 0.05067 | 0.00313 | 0.27339 | 0.01598 | 0.04014 | 0.00068 | 233 | 143 | 245 | 13 | 254 | 4 |
| HRGLG-N1-24 | 268 | 398 | 37 | 0.67 | 0.05562 | 0.00381 | 0.30211 | 0.02020 | 0.03990 | 0.00077 | 439 | 154 | 268 | 16 | 252 | 5 |
| DDKD-SE-N1-01 | Diorite | 283 | 366 | 20 | 0.77 | 0.05217 | 0.00122 | 0.29424 | 0.00755 | 0.04079 | 0.00050 | 293 | 53 | 262 | 6 | 258 | 3 |
| DDKD-SE-N1-02 | 331 | 416 | 22 | 0.80 | 0.05245 | 0.00115 | 0.29590 | 0.00829 | 0.04080 | 0.00061 | 305 | 50 | 263 | 6 | 258 | 4 |
| DDKD-SE-N1-03 | 710 | 588 | 39 | 1.21 | 0.05218 | 0.00110 | 0.29540 | 0.00696 | 0.04097 | 0.00051 | 293 | 48 | 263 | 5 | 259 | 3 |
| DDKD-SE-N1-04 | 191 | 291 | 15 | 0.66 | 0.05124 | 0.00135 | 0.28924 | 0.00863 | 0.04100 | 0.00069 | 252 | 60 | 258 | 7 | 259 | 4 |
| DDKD-SE-N1-05 | 221 | 319 | 18 | 0.69 | 0.05264 | 0.00122 | 0.29854 | 0.00746 | 0.04107 | 0.00048 | 313 | 53 | 265 | 6 | 259 | 3 |
| DDKD-SE-N1-06 | 651 | 688 | 42 | 0.95 | 0.05182 | 0.00097 | 0.29424 | 0.00513 | 0.04114 | 0.00045 | 278 | 43 | 262 | 4 | 260 | 3 |
| DDKD-SE-N1-07 | 283 | 402 | 22 | 0.70 | 0.05288 | 0.00112 | 0.30131 | 0.00771 | 0.04119 | 0.00059 | 323 | 48 | 267 | 6 | 260 | 4 |
| DDKD-SE-N1-08 | 344 | 430 | 25 | 0.80 | 0.05204 | 0.00105 | 0.29384 | 0.00559 | 0.04119 | 0.00065 | 287 | 46 | 262 | 4 | 260 | 4 |
| DDKD-SE-N1-09 | 509 | 381 | 23 | 1.34 | 0.05191 | 0.00140 | 0.29569 | 0.00940 | 0.04119 | 0.00079 | 281 | 62 | 263 | 7 | 260 | 5 |
| DDKD-SE-N1-10 | 274 | 328 | 21 | 0.84 | 0.05210 | 0.00172 | 0.29683 | 0.00982 | 0.04123 | 0.00060 | 290 | 75 | 264 | 8 | 260 | 4 |
| DDKD-SE-N1-11 | 629 | 596 | 32 | 1.05 | 0.05197 | 0.00134 | 0.29572 | 0.00841 | 0.04129 | 0.00083 | 284 | 59 | 263 | 7 | 261 | 5 |
| DDKD-SE-N1-12 | 690 | 627 | 37 | 1.10 | 0.05218 | 0.00103 | 0.29718 | 0.00628 | 0.04132 | 0.00058 | 293 | 45 | 264 | 5 | 261 | 4 |
| DDKD-SE-N1-13 | 513 | 485 | 29 | 1.06 | 0.05249 | 0.00086 | 0.29902 | 0.00584 | 0.04136 | 0.00056 | 307 | 37 | 266 | 5 | 261 | 3 |
| DDKD-SE-N1-14 | 159 | 298 | 16 | 0.53 | 0.05290 | 0.00104 | 0.30097 | 0.00692 | 0.04139 | 0.00071 | 325 | 45 | 267 | 5 | 261 | 4 |
| DDKD-SE-N1-15 | 362 | 427 | 24 | 0.85 | 0.05246 | 0.00120 | 0.29954 | 0.00702 | 0.04145 | 0.00064 | 305 | 52 | 266 | 5 | 262 | 4 |
| DDKD-SE-N1-16 | 301 | 386 | 22 | 0.78 | 0.05180 | 0.00082 | 0.29518 | 0.00489 | 0.04146 | 0.00055 | 277 | 36 | 263 | 4 | 262 | 3 |
| DDKD-SE-N1-17 | 415 | 456 | 26 | 0.91 | 0.05108 | 0.00127 | 0.29070 | 0.00644 | 0.04146 | 0.00060 | 244 | 57 | 259 | 5 | 262 | 4 |
| DDKD-SE-N1-18 | 280 | 384 | 21 | 0.73 | 0.05234 | 0.00133 | 0.29930 | 0.00685 | 0.04147 | 0.00065 | 300 | 58 | 266 | 5 | 262 | 4 |
| DDKD-SE-N1-19 | 562 | 535 | 31 | 1.05 | 0.05136 | 0.00109 | 0.29417 | 0.00708 | 0.04154 | 0.00070 | 257 | 49 | 262 | 6 | 262 | 4 |
| DDKD-SE-N1-20 | 414 | 451 | 25 | 0.92 | 0.05112 | 0.00114 | 0.29158 | 0.00707 | 0.04157 | 0.00070 | 246 | 52 | 260 | 6 | 263 | 4 |
| DDKD-SE-N1-21 | 512 | 512 | 31 | 1.00 | 0.05168 | 0.00060 | 0.29571 | 0.00446 | 0.04158 | 0.00047 | 271 | 27 | 263 | 3 | 263 | 3 |
| DDKD-SE-N1-22 | 363 | 396 | 23 | 0.92 | 0.05087 | 0.00087 | 0.29209 | 0.00678 | 0.04163 | 0.00065 | 235 | 40 | 260 | 5 | 263 | 4 |
| DDKD-SE-N1-23 | 335 | 405 | 23 | 0.83 | 0.05123 | 0.00104 | 0.29346 | 0.00687 | 0.04165 | 0.00061 | 251 | 47 | 261 | 5 | 263 | 4 |
| DDKD-SE-N1-24 | 307 | 412 | 21 | 0.75 | 0.05136 | 0.00134 | 0.29555 | 0.00909 | 0.04169 | 0.00068 | 257 | 60 | 263 | 7 | 263 | 4 |
| DDKD-SE-N1-25 | 53.1 | 218 | 37.5 | 0.24 | 0.06913 | 0.00116 | 1.39319 | 0.02218 | 0.14646 | 0.00180 | 903 | 35 | 886 | 9 | 881 | 10 |
| DDKD-SE-N1-26 | 81.6 | 318 | 60.7 | 0.26 | 0.06968 | 0.00076 | 1.44174 | 0.01700 | 0.15000 | 0.00154 | 919 | 22 | 906 | 7 | 901 | 9 |
| BLGX-N1-01 | Granodiorite | 332 | 689 | 28 | 0.48 | 0.05215 | 0.00097 | 0.26207 | 0.00575 | 0.03642 | 0.00040 | 292 | 43 | 236 | 5 | 231 | 3 |
| BLGX-N1-02 | 599 | 1858 | 72 | 0.32 | 0.05215 | 0.00060 | 0.26171 | 0.00406 | 0.03645 | 0.00050 | 292 | 26 | 236 | 3 | 231 | 3 |
| BLGX-N1-03 | 238 | 541 | 23 | 0.44 | 0.05180 | 0.00067 | 0.26352 | 0.00452 | 0.03684 | 0.00036 | 277 | 30 | 238 | 4 | 233 | 2 |
| BLGX-N1-04 | 431 | 790 | 34 | 0.55 | 0.05123 | 0.00052 | 0.26125 | 0.00332 | 0.03699 | 0.00030 | 251 | 23 | 236 | 3 | 234 | 2 |
| BLGX-N1-05 | 500 | 880 | 38 | 0.57 | 0.05087 | 0.00073 | 0.25947 | 0.00437 | 0.03700 | 0.00038 | 235 | 33 | 234 | 4 | 234 | 2 |
| BLGX-N1-06 | 250 | 356 | 16 | 0.70 | 0.05153 | 0.00088 | 0.26300 | 0.00504 | 0.03702 | 0.00033 | 265 | 39 | 237 | 4 | 234 | 2 |
| BLGX-N1-07 | 414 | 943 | 40 | 0.44 | 0.05156 | 0.00050 | 0.26357 | 0.00333 | 0.03704 | 0.00026 | 266 | 22 | 238 | 3 | 234 | 2 |
| BLGX-N1-08 | 401 | 777 | 34 | 0.52 | 0.05106 | 0.00060 | 0.26083 | 0.00378 | 0.03704 | 0.00031 | 244 | 27 | 235 | 3 | 234 | 2 |
| BLGX-N1-09 | 521 | 983 | 44 | 0.53 | 0.05140 | 0.00073 | 0.26319 | 0.00349 | 0.03713 | 0.00029 | 259 | 33 | 237 | 3 | 235 | 2 |
| BLGX-N1-10 | 373 | 744 | 34 | 0.50 | 0.05105 | 0.00095 | 0.26092 | 0.00456 | 0.03718 | 0.00029 | 243 | 43 | 235 | 4 | 235 | 2 |
| BLGX-N1-11 | 346 | 693 | 30 | 0.50 | 0.05091 | 0.00059 | 0.26219 | 0.00363 | 0.03724 | 0.00025 | 237 | 27 | 236 | 3 | 236 | 2 |
| BLGX-N1-12 | 253 | 561 | 25 | 0.45 | 0.05127 | 0.00104 | 0.26322 | 0.00525 | 0.03725 | 0.00033 | 253 | 46 | 237 | 4 | 236 | 2 |
| BLGX-N1-13 | 398 | 830 | 36 | 0.48 | 0.05022 | 0.00094 | 0.25835 | 0.00542 | 0.03726 | 0.00030 | 205 | 43 | 233 | 4 | 236 | 2 |
| BLGX-N1-14 | 296 | 650 | 27 | 0.45 | 0.05123 | 0.00122 | 0.26298 | 0.00607 | 0.03727 | 0.00050 | 251 | 55 | 237 | 5 | 236 | 3 |
| BLGX-N1-15 | 269 | 745 | 31 | 0.36 | 0.05218 | 0.00067 | 0.26885 | 0.00432 | 0.03735 | 0.00038 | 294 | 29 | 242 | 3 | 236 | 2 |
| BLGX-N1-16 | 415 | 801 | 36 | 0.52 | 0.05071 | 0.00078 | 0.26186 | 0.00438 | 0.03741 | 0.00037 | 227 | 35 | 236 | 4 | 237 | 2 |
| BLGX-N1-17 | 292 | 638 | 29 | 0.46 | 0.05104 | 0.00073 | 0.26332 | 0.00380 | 0.03748 | 0.00031 | 243 | 33 | 237 | 3 | 237 | 2 |
| BLGX-N1-18 | 245 | 581 | 25 | 0.42 | 0.05083 | 0.00077 | 0.26303 | 0.00445 | 0.03755 | 0.00035 | 233 | 35 | 237 | 4 | 238 | 2 |
| BLGX-N1-19 | 194 | 349 | 15 | 0.56 | 0.04971 | 0.00085 | 0.25233 | 0.00461 | 0.03681 | 0.00034 | 182 | 40 | 228 | 4 | 233 | 2 |
| BLGX-N2-01 | Diorite porphyrite | 128 | 330 | 13 | 0.39 | 0.05002 | 0.00096 | 0.25098 | 0.00514 | 0.03644 | 0.00035 | 196 | 44 | 227 | 4 | 231 | 2 |
| BLGX-N2-02 | 208 | 344 | 15 | 0.61 | 0.05043 | 0.00103 | 0.25221 | 0.00548 | 0.03629 | 0.00036 | 215 | 47 | 228 | 4 | 230 | 2 |
| BLGX-N2-03 | 124 | 274 | 12 | 0.45 | 0.05058 | 0.00099 | 0.25518 | 0.00546 | 0.03654 | 0.00034 | 222 | 45 | 231 | 4 | 231 | 2 |
| BLGX-N2-04 | 88 | 225 | 10 | 0.39 | 0.05073 | 0.00146 | 0.25194 | 0.00739 | 0.03606 | 0.00044 | 228 | 66 | 228 | 6 | 228 | 3 |
| BLGX-N2-05 | 136 | 312 | 13 | 0.44 | 0.05083 | 0.00096 | 0.25480 | 0.00515 | 0.03637 | 0.00041 | 233 | 44 | 230 | 4 | 230 | 3 |
| BLGX-N2-06 | 137 | 336 | 13 | 0.41 | 0.05114 | 0.00104 | 0.25721 | 0.00517 | 0.03667 | 0.00041 | 247 | 47 | 232 | 4 | 232 | 3 |
| BLGX-N2-07 | 180 | 360 | 15 | 0.50 | 0.05115 | 0.00085 | 0.25514 | 0.00455 | 0.03626 | 0.00035 | 248 | 38 | 231 | 4 | 230 | 2 |
| BLGX-N2-08 | 174 | 344 | 14 | 0.51 | 0.05107 | 0.00085 | 0.25496 | 0.00451 | 0.03623 | 0.00034 | 244 | 38 | 231 | 4 | 229 | 2 |
| BLGX-N2-09 | 182 | 316 | 14 | 0.58 | 0.05117 | 0.00092 | 0.25605 | 0.00463 | 0.03635 | 0.00028 | 248 | 41 | 231 | 4 | 230 | 2 |
| BLGX-N2-10 | 69 | 185 | 7 | 0.37 | 0.05147 | 0.00140 | 0.25636 | 0.00673 | 0.03633 | 0.00041 | 262 | 62 | 232 | 5 | 230 | 3 |
| BLGX-N2-11 | 111 | 271 | 11 | 0.41 | 0.05120 | 0.00129 | 0.25473 | 0.00676 | 0.03605 | 0.00038 | 250 | 58 | 230 | 5 | 228 | 2 |
| BLGX-N2-12 | 136 | 299 | 13 | 0.46 | 0.05153 | 0.00103 | 0.25661 | 0.00605 | 0.03615 | 0.00042 | 265 | 46 | 232 | 5 | 229 | 3 |
| BLGX-N2-13 | 180 | 357 | 15 | 0.51 | 0.05177 | 0.00104 | 0.25895 | 0.00542 | 0.03630 | 0.00037 | 275 | 46 | 234 | 4 | 230 | 2 |
| BLGX-N2-14 | 121 | 256 | 11 | 0.47 | 0.05196 | 0.00099 | 0.26293 | 0.00535 | 0.03670 | 0.00033 | 284 | 44 | 237 | 4 | 232 | 2 |
| BLGX-N2-15 | 123 | 268 | 11 | 0.46 | 0.05205 | 0.00124 | 0.25780 | 0.00600 | 0.03604 | 0.00035 | 287 | 54 | 233 | 5 | 228 | 2 |
| BLGX-N2-16 | 115 | 233 | 10 | 0.49 | 0.05215 | 0.00125 | 0.25883 | 0.00621 | 0.03609 | 0.00039 | 292 | 55 | 234 | 5 | 229 | 2 |
| BLGX-N2-17 | 236 | 456 | 19 | 0.52 | 0.05222 | 0.00097 | 0.25927 | 0.00496 | 0.03597 | 0.00031 | 295 | 43 | 234 | 4 | 228 | 2 |
| BLGX-N2-18 | 163 | 352 | 15 | 0.46 | 0.05293 | 0.00104 | 0.26447 | 0.00505 | 0.03635 | 0.00031 | 326 | 45 | 238 | 4 | 230 | 2 |
| BLGX-N2-19 | 852 | 1456 | 57 | 0.59 | 0.05350 | 0.00067 | 0.27050 | 0.00441 | 0.03661 | 0.00032 | 350 | 28 | 243 | 4 | 232 | 2 |
| BLGX-N2-20 | 175 | 361 | 21 | 0.48 | 0.05180 | 0.00102 | 0.25888 | 0.00539 | 0.03628 | 0.00033 | 274 | 45 | 235 | 5 | 230 | 2 |
| LMR-N1-01 | Monzogranite | 324 | 670 | 29 | 0.48 | 0.05031 | 0.00148 | 0.26302 | 0.00787 | 0.03776 | 0.00036 | 209 | 69 | 237 | 6 | 239 | 2 |
| LMR-N1-02 | 329 | 775 | 34 | 0.43 | 0.05036 | 0.00134 | 0.26768 | 0.00744 | 0.03830 | 0.00037 | 213 | 61 | 241 | 6 | 242 | 2 |
| LMR-N1-03 | 70 | 174 | 7 | 0.40 | 0.05032 | 0.00295 | 0.25911 | 0.01479 | 0.03731 | 0.00048 | 209 | 131 | 234 | 12 | 236 | 3 |
| LMR-N1-04 | 371 | 810 | 35 | 0.46 | 0.05007 | 0.00153 | 0.26212 | 0.00789 | 0.03768 | 0.00033 | 198 | 105 | 236 | 6 | 238 | 2 |
| LMR-N1-05 | 261 | 507 | 22 | 0.52 | 0.05048 | 0.00164 | 0.26208 | 0.00841 | 0.03744 | 0.00036 | 217 | 81 | 236 | 7 | 237 | 2 |
| LMR-N1-06 | 634 | 1189 | 57 | 0.53 | 0.05072 | 0.00262 | 0.26984 | 0.01455 | 0.03791 | 0.00037 | 228 | 119 | 243 | 12 | 240 | 2 |
| LMR-N1-07 | 331 | 863 | 41 | 0.38 | 0.04972 | 0.00159 | 0.26525 | 0.00887 | 0.03817 | 0.00041 | 189 | 74 | 239 | 7 | 241 | 3 |
| LMR-N1-08 | 95 | 199 | 9 | 0.48 | 0.05291 | 0.00258 | 0.27221 | 0.01236 | 0.03772 | 0.00049 | 324 | 111 | 244 | 10 | 239 | 3 |
| LMR-N1-09 | 553 | 634 | 30 | 0.87 | 0.05205 | 0.00182 | 0.27504 | 0.00957 | 0.03820 | 0.00042 | 287 | 80 | 247 | 8 | 242 | 3 |
| LMR-N1-10 | 482 | 923 | 41 | 0.52 | 0.05233 | 0.00150 | 0.27765 | 0.00783 | 0.03822 | 0.00038 | 298 | 67 | 249 | 6 | 242 | 2 |
| LMR-N1-11 | 478 | 697 | 32 | 0.69 | 0.05319 | 0.00173 | 0.27499 | 0.00842 | 0.03747 | 0.00035 | 345 | 74 | 247 | 7 | 237 | 2 |
| LMR-N1-12 | 525 | 755 | 35 | 0.70 | 0.05315 | 0.00173 | 0.28321 | 0.00936 | 0.03837 | 0.00039 | 345 | 74 | 253 | 7 | 243 | 2 |
| LMR-N1-13 | 185 | 375 | 16 | 0.49 | 0.05328 | 0.00186 | 0.27794 | 0.00971 | 0.03758 | 0.00040 | 343 | 78 | 249 | 8 | 238 | 2 |
| LMR-N1-14 | 970 | 1091 | 52 | 0.89 | 0.05325 | 0.00144 | 0.28194 | 0.00742 | 0.03806 | 0.00030 | 339 | 61 | 252 | 6 | 241 | 2 |
| LMR-N1-15 | 72 | 176 | 8 | 0.41 | 0.05552 | 0.00293 | 0.28792 | 0.01383 | 0.03838 | 0.00051 | 432 | 119 | 257 | 11 | 243 | 3 |
| LMR-N1-16 | 268 | 805 | 42 | 0.33 | 0.05610 | 0.00169 | 0.36503 | 0.01417 | 0.04630 | 0.00098 | 457 | 67 | 316 | 11 | 292 | 6 |
| LMR-N1-17 | 347 | 635 | 37 | 0.55 | 0.05027 | 0.00201 | 0.33931 | 0.01682 | 0.04687 | 0.00077 | 206 | 88 | 297 | 13 | 295 | 5 |

## Table S3 Zircon Lu-Hf isotopic data for the DDKD diorite, BLGX granodiorite and diorite porphyry in the EKOB

| **Sample** | **Rock type** | **t (Ma)** | **176Yb/177Hf** | **2σ** | **176Lu/177Hf** | **2σ** | **176Hf/177Hf** | **2σ** | **εHf(0)** | **εHf(t)** | **2σ** | **TDM1** | **TDM2** | **fLu/Hf** |
| --- | --- | --- | --- | --- | --- | --- | --- | --- | --- | --- | --- | --- | --- | --- |
| DDKD-SE-N1-01 | Diorite | 261 | 0.025066 | 0.000609 | 0.000912 | 0.000018 | 0.282663 | 0.000019 | -3.85 | 1.73 | 0.67 | 0.83 | 1.17 | -0.97 |
| DDKD-SE-N1-02 | 261 | 0.081273 | 0.003449 | 0.002791 | 0.000108 | 0.282640 | 0.000020 | -4.66 | 0.60 | 0.71 | 0.91 | 1.25 | -0.92 |
| DDKD-SE-N1-03 | 261 | 0.036412 | 0.000728 | 0.001317 | 0.000020 | 0.282666 | 0.000020 | -3.73 | 1.78 | 0.69 | 0.84 | 1.17 | -0.96 |
| DDKD-SE-N1-04 | 261 | 0.059098 | 0.000621 | 0.002040 | 0.000012 | 0.282653 | 0.000020 | -4.20 | 1.18 | 0.70 | 0.87 | 1.21 | -0.94 |
| DDKD-SE-N1-05 | 261 | 0.053792 | 0.000269 | 0.001774 | 0.000010 | 0.282733 | 0.000017 | -1.38 | 4.06 | 0.60 | 0.75 | 1.03 | -0.95 |
| DDKD-SE-N1-06 | 261 | 0.091187 | 0.002461 | 0.003077 | 0.000046 | 0.282601 | 0.000019 | -6.05 | -0.84 | 0.68 | 0.98 | 1.34 | -0.91 |
| DDKD-SE-N1-07 | 261 | 0.044234 | 0.001730 | 0.001561 | 0.000068 | 0.282670 | 0.000021 | -3.61 | 1.85 | 0.75 | 0.84 | 1.17 | -0.95 |
| DDKD-SE-N1-08 | 261 | 0.074231 | 0.001180 | 0.002417 | 0.000039 | 0.282649 | 0.000020 | -4.36 | 0.96 | 0.70 | 0.89 | 1.22 | -0.93 |
| BLGX-N1-01 | Granodoirite | 235 | 0.013273 | 0.000234 | 0.000588 | 0.000006 | 0.282512 | 0.000028 | -9.20 | -4.13 | 0.98 | 1.04 | 1.53 | -0.98 |
| BLGX-N1-02 | 235 | 0.027498 | 0.000435 | 0.001111 | 0.000014 | 0.282518 | 0.000018 | -8.99 | -4.01 | 0.63 | 1.04 | 1.52 | -0.97 |
| BLGX-N1-03 | 235 | 0.019816 | 0.000212 | 0.000826 | 0.000012 | 0.282534 | 0.000016 | -8.41 | -3.38 | 0.56 | 1.01 | 1.48 | -0.98 |
| BLGX-N1-04 | 235 | 0.027533 | 0.000187 | 0.001089 | 0.000008 | 0.282584 | 0.000016 | -6.63 | -1.64 | 0.58 | 0.95 | 1.37 | -0.97 |
| BLGX-N1-05 | 235 | 0.027204 | 0.000329 | 0.001111 | 0.000009 | 0.282568 | 0.000016 | -7.23 | -2.24 | 0.57 | 0.97 | 1.41 | -0.97 |
| BLGX-N1-06 | 235 | 0.016765 | 0.000154 | 0.000684 | 0.000009 | 0.282581 | 0.000015 | -6.77 | -1.71 | 0.54 | 0.94 | 1.37 | -0.98 |
| BLGX-N1-07 | 235 | 0.020938 | 0.000271 | 0.000866 | 0.000007 | 0.282541 | 0.000018 | -8.17 | -3.14 | 0.65 | 1.00 | 1.46 | -0.97 |
| BLGX-N1-08 | 235 | 0.024058 | 0.000090 | 0.000955 | 0.000008 | 0.282534 | 0.000017 | -8.42 | -3.41 | 0.59 | 1.01 | 1.48 | -0.97 |
| BLGX-N1-09 | 235 | 0.024899 | 0.000458 | 0.000986 | 0.000017 | 0.282531 | 0.000021 | -8.54 | -3.53 | 0.73 | 1.02 | 1.49 | -0.97 |
| BLGX-N1-10 | 235 | 0.026007 | 0.000271 | 0.000986 | 0.000011 | 0.282526 | 0.000019 | -8.70 | -3.69 | 0.68 | 1.03 | 1.50 | -0.97 |
| BLGX-N1-11 | 235 | 0.031517 | 0.000244 | 0.001211 | 0.000014 | 0.282588 | 0.000021 | -6.50 | -1.53 | 0.76 | 0.94 | 1.36 | -0.96 |
| BLGX-N1-12 | 235 | 0.039866 | 0.000375 | 0.001592 | 0.000013 | 0.282543 | 0.000029 | -8.09 | -3.17 | 1.03 | 1.02 | 1.47 | -0.95 |
| BLGX-N2-01 | Doirite porphyry | 230 | 0.009574 | 0.000166 | 0.000393 | 0.000006 | 0.282510 | 0.000018 | -9.28 | -4.29 | 0.65 | 1.03 | 1.53 | -0.99 |
| BLGX-N2-02 | 230 | 0.016134 | 0.000481 | 0.000706 | 0.000018 | 0.282509 | 0.000019 | -9.29 | -4.35 | 0.69 | 1.04 | 1.54 | -0.98 |
| BLGX-N2-03 | 230 | 0.016553 | 0.000105 | 0.000667 | 0.000004 | 0.282585 | 0.000019 | -6.60 | -1.65 | 0.66 | 0.94 | 1.37 | -0.98 |
| BLGX-N2-04 | 230 | 0.018302 | 0.000196 | 0.000710 | 0.000007 | 0.282543 | 0.000017 | -8.09 | -3.14 | 0.59 | 0.99 | 1.46 | -0.98 |
| BLGX-N2-05 | 230 | 0.021270 | 0.000350 | 0.000847 | 0.000011 | 0.282551 | 0.000018 | -7.82 | -2.90 | 0.64 | 0.99 | 1.44 | -0.97 |
| BLGX-N2-06 | 230 | 0.013411 | 0.000099 | 0.000538 | 0.000004 | 0.282491 | 0.000038 | -9.95 | -4.98 | 1.35 | 1.06 | 1.58 | -0.98 |
| BLGX-N2-07 | 230 | 0.017291 | 0.000714 | 0.000663 | 0.000025 | 0.282556 | 0.000020 | -7.64 | -2.69 | 0.71 | 0.98 | 1.43 | -0.98 |
| BLGX-N2-08 | 230 | 0.019854 | 0.000574 | 0.000806 | 0.000021 | 0.282581 | 0.000018 | -6.75 | -1.82 | 0.64 | 0.94 | 1.38 | -0.98 |
| BLGX-N2-09 | 230 | 0.022001 | 0.000238 | 0.000865 | 0.000007 | 0.282542 | 0.000026 | -8.13 | -3.21 | 0.92 | 1.00 | 1.46 | -0.97 |
| BLGX-N2-10 | 230 | 0.018045 | 0.000200 | 0.000714 | 0.000011 | 0.282543 | 0.000017 | -8.10 | -3.16 | 0.60 | 1.00 | 1.46 | -0.98 |
| BLGX-N2-11 | 230 | 0.022666 | 0.000772 | 0.000873 | 0.000025 | 0.282535 | 0.000022 | -8.39 | -3.47 | 0.77 | 1.01 | 1.48 | -0.97 |
| BLGX-N2-12 | 230 | 0.030862 | 0.000209 | 0.001143 | 0.000007 | 0.282584 | 0.000024 | -6.66 | -1.79 | 0.84 | 0.95 | 1.37 | -0.97 |

## Table S4 Major elements (wt.%) data for the late Permian-middle Triassic intermediate-acid intrusive rocks in the EKOB

| **Intrusion** | **Sample** | **SiO2** | **Al2O3** | **Fe2O3T** | **MgO** | **CaO** | **Na2O** | **K2O** | **MnO** | **TiO2** | **P2O5** | **LOI** | **Total** | **FeOT** | **Na2O+K2O** | **A/CNK** | **A/NK** | **Mg#** |
| --- | --- | --- | --- | --- | --- | --- | --- | --- | --- | --- | --- | --- | --- | --- | --- | --- | --- | --- |
| HRGLG monzogranite | HRGLG-Y1-1 | 74.66 | 13.73 | 1.71 | 0.38 | 1.42 | 3.91 | 3.17 | 0.10 | 0.14 | 0.03 | 0.60 | 99.84 | 1.54 | 7.08 | 1.10 | 1.37 | 30 |
| HRGLG-Y1-2 | 74.97 | 13.72 | 1.48 | 0.24 | 1.37 | 3.61 | 3.67 | 0.11 | 0.11 | 0.02 | 0.55 | 99.85 | 1.33 | 7.28 | 1.10 | 1.36 | 24 |
| HRGLG-Y1-3 | 74.02 | 13.91 | 1.91 | 0.39 | 1.36 | 3.69 | 3.77 | 0.11 | 0.16 | 0.03 | 0.49 | 99.84 | 1.72 | 7.46 | 1.10 | 1.34 | 29 |
| HRGLG-Y1-4 | 74.14 | 13.73 | 1.90 | 0.45 | 1.36 | 3.59 | 3.84 | 0.11 | 0.16 | 0.03 | 0.51 | 99.82 | 1.71 | 7.43 | 1.09 | 1.34 | 32 |
| HRGLG-Y1-5 | 75.27 | 13.44 | 1.62 | 0.29 | 1.52 | 3.73 | 3.02 | 0.12 | 0.11 | 0.03 | 0.68 | 99.83 | 1.46 | 6.75 | 1.10 | 1.41 | 26 |
| HRGLG-Y1-6 | 75.19 | 13.48 | 1.47 | 0.22 | 0.90 | 3.46 | 4.22 | 0.11 | 0.12 | 0.02 | 0.65 | 99.84 | 1.32 | 7.68 | 1.13 | 1.29 | 23 |
| LMR monzogranite | LMR-Y1-1 | 74.04 | 13.78 | 1.95 | 0.40 | 1.43 | 3.08 | 4.75 | 0.12 | 0.12 | 0.04 | 0.42 | 100.13 | 1.76 | 7.83 | 1.07 | 1.32 | 29 |
| LMR-Y1-2 | 71.89 | 14.28 | 3.00 | 0.61 | 1.80 | 3.35 | 4.02 | 0.13 | 0.25 | 0.09 | 0.50 | 99.92 | 2.70 | 7.37 | 1.09 | 1.42 | 29 |
| LMR-Y1-3 | 71.96 | 13.84 | 2.77 | 0.49 | 1.75 | 3.24 | 4.32 | 0.13 | 0.21 | 0.08 | 0.50 | 99.27 | 2.49 | 7.56 | 1.05 | 1.35 | 26 |
| BLGX granodiorite | BLGX-Y1-1 | 68.08 | 14.76 | 3.95 | 1.52 | 3.64 | 3.55 | 2.86 | 0.12 | 0.43 | 0.11 | 0.47 | 99.47 | 3.55 | 6.41 | 0.95 | 1.63 | 43 |
| BLGX-Y1-2 | 69.13 | 14.47 | 3.98 | 1.46 | 3.39 | 3.32 | 3.14 | 0.14 | 0.41 | 0.10 | 0.44 | 99.97 | 3.58 | 6.46 | 0.96 | 1.61 | 42 |
| BLGX-Y1-3 | 66.70 | 15.66 | 4.02 | 1.53 | 3.93 | 3.84 | 2.70 | 0.11 | 0.44 | 0.10 | 0.55 | 99.57 | 3.62 | 6.54 | 0.96 | 1.67 | 43 |
| BLGX-Y1-4 | 68.10 | 14.89 | 3.87 | 1.52 | 3.63 | 3.51 | 2.93 | 0.11 | 0.43 | 0.10 | 0.63 | 99.73 | 3.49 | 6.44 | 0.96 | 1.64 | 44 |
| BLGX-Y1-5 | 67.14 | 14.60 | 4.35 | 1.78 | 3.42 | 3.46 | 3.15 | 0.13 | 0.47 | 0.11 | 0.98 | 99.58 | 3.92 | 6.61 | 0.95 | 1.58 | 45 |
| KEQK diorite | KEQK-Y1-1 | 62.28 | 16.87 | 5.02 | 1.84 | 4.18 | 3.65 | 2.79 | 0.09 | 0.66 | 0.15 | 1.07 | 98.60 | 4.52 | 6.44 | 1.01 | 1.84 | 42 |
| KEQK-Y1-2 | 60.58 | 16.95 | 6.10 | 2.50 | 4.91 | 3.74 | 2.58 | 0.12 | 0.72 | 0.16 | 1.30 | 99.66 | 5.49 | 6.32 | 0.95 | 1.87 | 45 |
| KEQK-Y1-3 | 62.73 | 17.30 | 4.94 | 1.63 | 3.78 | 3.49 | 3.32 | 0.10 | 0.69 | 0.18 | 1.27 | 99.43 | 4.45 | 6.81 | 1.07 | 1.82 | 40 |
| DDKD diorite | DDKD-SE-Y1-1 | 61.13 | 16.03 | 5.72 | 2.59 | 4.78 | 3.22 | 2.41 | 0.13 | 0.61 | 0.16 | 3.14 | 99.91 | 5.15 | 5.63 | 0.96 | 2.03 | 47 |
| DDKD-SE-Y1-2 | 61.66 | 16.33 | 5.63 | 2.43 | 4.29 | 4.00 | 2.11 | 0.12 | 0.60 | 0.15 | 2.61 | 99.93 | 5.07 | 6.11 | 0.98 | 1.84 | 46 |
| DDKD-SE-Y1-3 | 60.43 | 16.12 | 5.73 | 2.54 | 4.45 | 3.25 | 2.61 | 0.13 | 0.60 | 0.16 | 3.96 | 99.97 | 5.16 | 5.86 | 0.99 | 1.97 | 47 |
| DDKD-SE-Y1-4 | 61.31 | 16.03 | 5.39 | 2.33 | 4.33 | 4.54 | 1.61 | 0.12 | 0.57 | 0.15 | 3.56 | 99.94 | 4.85 | 6.15 | 0.94 | 1.74 | 46 |
| BLGX diorite porphyry | BLGX-Y2-1 | 55.32 | 16.42 | 6.96 | 5.38 | 6.64 | 3.88 | 1.81 | 0.13 | 0.92 | 0.22 | 2.28 | 99.94 | 6.26 | 5.68 | 0.80 | 1.95 | 60 |
| BLGX-Y2-2 | 56.22 | 16.43 | 6.66 | 4.90 | 6.69 | 3.68 | 1.69 | 0.13 | 0.89 | 0.22 | 2.01 | 99.51 | 5.99 | 5.37 | 0.82 | 2.06 | 59 |
| BLGX-Y2-3 | 55.50 | 16.35 | 6.77 | 4.98 | 6.66 | 3.61 | 1.75 | 0.14 | 0.89 | 0.23 | 2.55 | 99.43 | 6.09 | 5.36 | 0.82 | 2.07 | 59 |
| BLGX-Y2-4 | 55.17 | 16.22 | 6.96 | 5.28 | 6.72 | 3.69 | 1.72 | 0.14 | 0.90 | 0.22 | 2.49 | 99.50 | 6.26 | 5.42 | 0.80 | 2.02 | 60 |
| BLGX-Y2-5 | 55.59 | 16.38 | 6.85 | 5.41 | 6.71 | 3.96 | 1.93 | 0.11 | 0.90 | 0.22 | 1.75 | 99.81 | 6.17 | 5.89 | 0.79 | 1.88 | 61 |

## Table S5 Detection limits for the REEs and trace elements in this paper

| **Element** | **Detection limit (ppm)** | **Element** | **Detection limit (ppm)** | **Element** | **Detection limit (ppm)** | **Element** | **Detection limit (ppm)** |
| --- | --- | --- | --- | --- | --- | --- | --- |
| Li7 | 0.073 | As75 | 0.273 | La139 | 0.008 | Tm169 | 0.002 |
| Be9 | 0.034 | Rb85 | 0.203 | Ce140 | 0.058 | Yb172 | 0.002 |
| Sc45 | 0.049 | Sr88 | 0.191 | Pr141 | 0.003 | Lu175 | 0.002 |
| Ti49 | 0.151 | Y89 | 0.004 | Nd146 | 0.005 | Hf178 | 0.036 |
| V51 | 0.2 | Zr90 | 0.035 | Sm147 | 0.005 | Ta181 | 0.036 |
| Mn55 | 0.15 | Nb93 | 0.026 | Eu153 | 0.003 | W182 | 0.03 |
| Co59 | 0.145 | Mo95 | 0.198 | Gd157 | 0.004 | Tl205 | 0.043 |
| Ni60 | 0.195 | Cd114 | 0.042 | Tb159 | 0.002 | Pb208 | 0.063 |
| Cu65 | 0.274 | In115 | 0.041 | Dy163 | 0.003 | Bi209 | 0.045 |
| Zn66 | 0.372 | Cs133 | 0.034 | Ho165 | 0.002 | Th232 | 0.039 |
| Ga71 | 0.017 | Ba137 | 0.208 | Er166 | 0.002 | U238 | 0.005 |

## Table S6 Rare earth elements (ppm) contents for the late Permian-middle Triassic intermediate-acid intrusive rocks in the EKOB

| **Intrusion** | **Sample** | **La** | **Ce** | **Pr** | **Nd** | **Sm** | **Eu** | **Gd** | **Tb** | **Dy** | **Ho** | **Er** | **Tm** | **Yb** | **Lu** | **∑REE** | **Eu/Eu*** | **Ce/Ce*** | **(La/Yb)N** | **HREE/LREE** |
| --- | --- | --- | --- | --- | --- | --- | --- | --- | --- | --- | --- | --- | --- | --- | --- | --- | --- | --- | --- | --- |
| HRGLG monzogranite | HRGLG-Y1-1 | 14.8 | 25.4 | 2.60 | 8.84 | 1.36 | 0.41 | 1.05 | 0.18 | 1.02 | 0.20 | 0.69 | 0.13 | 0.90 | 0.16 | 57.7 | 1.06 | 1.00 | 11.8 | 12.4 |
| HRGLG-Y1-2 | 13.9 | 22.7 | 2.40 | 7.66 | 1.19 | 0.49 | 0.97 | 0.14 | 0.64 | 0.13 | 0.40 | 0.08 | 0.56 | 0.09 | 51.3 | 1.40 | 0.96 | 17.8 | 16.1 |
| HRGLG-Y1-3 | 17.4 | 29.7 | 3.05 | 10.3 | 1.54 | 0.50 | 1.37 | 0.21 | 1.12 | 0.23 | 0.80 | 0.14 | 0.93 | 0.17 | 67.5 | 1.05 | 1.00 | 13.4 | 12.6 |
| HRGLG-Y1-4 | 18.4 | 31.3 | 3.19 | 10.9 | 1.74 | 0.49 | 1.43 | 0.23 | 1.34 | 0.26 | 0.90 | 0.16 | 1.11 | 0.19 | 71.6 | 0.95 | 1.00 | 11.9 | 11.8 |
| HRGLG-Y1-5 | 19.4 | 33.9 | 3.55 | 11.6 | 1.79 | 0.49 | 1.44 | 0.18 | 0.99 | 0.18 | 0.61 | 0.09 | 0.69 | 0.13 | 75.0 | 0.93 | 1.00 | 20.2 | 16.4 |
| HRGLG-Y1-6 | 13.0 | 21.2 | 2.20 | 7.16 | 1.12 | 0.51 | 0.91 | 0.15 | 0.71 | 0.15 | 0.47 | 0.08 | 0.66 | 0.12 | 48.4 | 1.53 | 0.97 | 14.1 | 13.9 |
| LMR monzogranite | LMR-Y1-1 | 35.3 | 65.3 | 6.60 | 21.5 | 3.20 | 0.73 | 2.32 | 0.40 | 2.33 | 0.43 | 1.32 | 0.20 | 1.45 | 0.23 | 141 | 0.82 | 1.05 | 17.5 | 15.3 |
| LMR-Y1-2 | 36.4 | 68.9 | 7.25 | 25.0 | 4.52 | 0.84 | 3.89 | 0.66 | 3.60 | 0.75 | 2.17 | 0.34 | 2.26 | 0.36 | 157 | 0.62 | 1.04 | 11.5 | 10.2 |
| LMR-Y1-3 | 37.4 | 71.6 | 7.27 | 24.01 | 3.92 | 0.74 | 3.18 | 0.55 | 3.19 | 0.64 | 1.86 | 0.31 | 2.03 | 0.34 | 157 | 0.64 | 1.07 | 13.2 | 12.0 |
| BLGX granodiorite | BLGX-Y1-1 | 24.1 | 38.2 | 5.06 | 18.1 | 3.67 | 0.85 | 3.09 | 0.45 | 2.73 | 0.51 | 1.62 | 0.22 | 1.58 | 0.26 | 100 | 0.77 | 0.85 | 10.9 | 8.60 |
| BLGX-Y1-2 | 24.1 | 37.9 | 4.92 | 17.4 | 3.41 | 0.86 | 2.85 | 0.41 | 2.51 | 0.47 | 1.48 | 0.21 | 1.44 | 0.23 | 98.2 | 0.84 | 0.85 | 12.0 | 9.22 |
| BLGX-Y1-3 | 28.7 | 43.4 | 5.49 | 19.0 | 3.53 | 0.84 | 3.05 | 0.42 | 2.63 | 0.49 | 1.57 | 0.22 | 1.52 | 0.24 | 111 | 0.78 | 0.85 | 13.6 | 9.95 |
| BLGX-Y1-4 | 25.8 | 39.9 | 5.18 | 17.7 | 3.47 | 0.82 | 2.96 | 0.44 | 2.62 | 0.49 | 1.54 | 0.22 | 1.51 | 0.24 | 103 | 0.79 | 0.85 | 12.3 | 9.28 |
| BLGX-Y1-5 | 32.2 | 47.2 | 6.47 | 24.0 | 4.16 | 0.88 | 3.51 | 0.50 | 3.01 | 0.56 | 1.80 | 0.24 | 1.69 | 0.28 | 127 | 0.70 | 0.80 | 13.6 | 9.92 |
| KEQK diorite | KEQK-Y1-1 | 26.8 | 54.2 | 5.84 | 20.8 | 3.91 | 1.10 | 3.43 | 0.52 | 2.99 | 0.59 | 1.71 | 0.25 | 1.67 | 0.27 | 124 | 0.92 | 1.06 | 11.5 | 9.86 |
| KEQK-Y1-2 | 24.7 | 53.7 | 6.15 | 23.0 | 4.64 | 1.27 | 4.11 | 0.63 | 3.68 | 0.75 | 2.18 | 0.31 | 2.05 | 0.33 | 128 | 0.89 | 1.07 | 8.64 | 8.08 |
| KEQK-Y1-3 | 27.1 | 54.9 | 5.80 | 20.4 | 3.80 | 0.93 | 3.17 | 0.47 | 2.74 | 0.53 | 1.61 | 0.22 | 1.49 | 0.23 | 123 | 0.82 | 1.07 | 13.0 | 10.8 |
| KEQK diorite | DDKD-SE-Y1-1 | 32.1 | 55.1 | 6.58 | 24.9 | 4.18 | 0.93 | 3.72 | 0.54 | 3.15 | 0.62 | 1.70 | 0.30 | 1.90 | 0.32 | 136 | 0.72 | 0.93 | 12.1 | 10.1 |
| DDKD-SE-Y1-2 | 32.8 | 57.2 | 6.73 | 24.7 | 4.11 | 0.89 | 3.62 | 0.51 | 3.10 | 0.60 | 1.64 | 0.30 | 1.85 | 0.31 | 138 | 0.71 | 0.94 | 12.7 | 10.6 |
| DDKD-SE-Y1-3 | 34.4 | 60.8 | 6.81 | 25.8 | 4.38 | 0.98 | 3.88 | 0.54 | 3.27 | 0.64 | 1.74 | 0.30 | 1.90 | 0.33 | 146 | 0.72 | 0.97 | 13.0 | 10.6 |
| DDKD-SE-Y1-4 | 32.9 | 57.4 | 6.65 | 24.7 | 4.13 | 0.90 | 3.68 | 0.52 | 3.12 | 0.60 | 1.67 | 0.30 | 1.87 | 0.31 | 139 | 0.71 | 0.95 | 12.7 | 10.5 |
| BLGX diorite porphyry | BLGX-Y2-1 | 18.7 | 33.4 | 5.09 | 21.3 | 4.63 | 1.29 | 4.18 | 0.57 | 3.47 | 0.61 | 1.82 | 0.23 | 1.47 | 0.23 | 97.0 | 0.90 | 0.84 | 9.12 | 6.70 |
| BLGX-Y2-2 | 16.3 | 28.8 | 4.28 | 17.5 | 3.79 | 1.11 | 3.42 | 0.48 | 2.85 | 0.52 | 1.55 | 0.20 | 1.28 | 0.19 | 82.2 | 0.94 | 0.84 | 9.14 | 6.84 |
| BLGX-Y2-3 | 18.0 | 32.2 | 5.02 | 20.8 | 4.82 | 1.35 | 4.34 | 0.61 | 3.61 | 0.66 | 1.92 | 0.25 | 1.59 | 0.24 | 95.4 | 0.90 | 0.83 | 8.16 | 6.22 |
| BLGX-Y2-4 | 22.2 | 37.3 | 5.38 | 21.4 | 4.60 | 1.29 | 4.02 | 0.58 | 3.36 | 0.62 | 1.84 | 0.23 | 1.50 | 0.23 | 105 | 0.92 | 0.84 | 10.6 | 7.45 |
| BLGX-Y2-5 | 32.4 | 46.5 | 6.50 | 25.3 | 4.45 | 1.23 | 3.92 | 0.52 | 3.14 | 0.57 | 1.73 | 0.22 | 1.40 | 0.21 | 128 | 0.90 | 0.79 | 16.6 | 9.94 |

## **Table S7 Trace elements (ppm) contents for the late Permian-middle Triassic intermediate-acid intrusive rocks in the EKOB**

| **Intrusion** | **Sample** | **Cr** | **Co** | **Ni** | **Cu** | **Ga** | **Rb** | **Sr** | **Y** | **Zr** | **Nb** | **Cs** | **Ba** | **Hf** | **Ta** | **Tl** | **Pb** | **Th** | **U** | **Zr+Nb+Ce+Y** | **Nb/Ta** | **Zr/Hf** | **Ce/Pb** | **Nb/U** | **Nb/La** | **Nb/Th** | **Nb/Y** | **Th/La** | **U/Th** | **Th/Nb** |
| --- | --- | --- | --- | --- | --- | --- | --- | --- | --- | --- | --- | --- | --- | --- | --- | --- | --- | --- | --- | --- | --- | --- | --- | --- | --- | --- | --- | --- | --- | --- |
| HRGLG monzogranite | HRGLG-Y1-1 | 10.1 | 2.19 | 3.54 | 14.4 | 11.7 | 119 | 222 | 5.89 | 54.7 | 6.64 | 5.18 | 501 | 2.42 | 0.79 | 0.71 | 23.8 | 7.14 | 1.68 | 92.6 | 8.44 | 22.6 | 1.07 | 3.95 | 0.45 | 0.93 | 1.13 | 0.48 | 0.24 | 1.08 |
| HRGLG-Y1-2 | 10.4 | 1.52 | 2.25 | 7.22 | 11.2 | 122 | 221 | 3.44 | 43.6 | 4.87 | 4.32 | 693 | 1.86 | 0.51 | 0.72 | 26.8 | 5.75 | 1.39 | 74.6 | 9.64 | 23.4 | 0.85 | 3.50 | 0.35 | 0.85 | 1.42 | 0.41 | 0.24 | 1.18 |
| HRGLG-Y1-3 | 5.14 | 2.83 | 5.81 | 15.4 | 13.2 | 145 | 268 | 6.63 | 61.7 | 8.17 | 6.04 | 778 | 2.54 | 0.85 | 0.85 | 29.0 | 9.10 | 3.45 | 106 | 9.59 | 24.3 | 1.02 | 2.37 | 0.47 | 0.90 | 1.23 | 0.52 | 0.38 | 1.11 |
| HRGLG-Y1-4 | 9.31 | 2.30 | 3.67 | 14.4 | 12.6 | 141 | 253 | 7.72 | 63.7 | 8.32 | 5.88 | 681 | 2.75 | 0.89 | 0.85 | 28.1 | 9.07 | 2.48 | 111 | 9.40 | 23.2 | 1.11 | 3.35 | 0.45 | 0.92 | 1.08 | 0.49 | 0.27 | 1.09 |
| HRGLG-Y1-5 | 14.6 | 2.59 | 5.86 | 12.5 | 11.9 | 102 | 206 | 4.94 | 46.1 | 5.06 | 3.96 | 461 | 1.96 | 0.57 | 0.59 | 22.3 | 9.17 | 2.23 | 90.0 | 8.85 | 23.5 | 1.52 | 2.27 | 0.26 | 0.55 | 1.02 | 0.47 | 0.24 | 1.81 |
| HRGLG-Y1-6 | 10.9 | 2.52 | 3.85 | 19.5 | 11.1 | 143 | 208 | 4.31 | 47.7 | 5.12 | 4.68 | 858 | 1.99 | 0.58 | 0.81 | 29.1 | 5.30 | 1.38 | 78.3 | 8.83 | 24.0 | 0.73 | 3.71 | 0.39 | 0.97 | 1.19 | 0.41 | 0.26 | 1.04 |
| LMR monzogranite | LMR-Y1-1 | 28.3 | 2.42 | 10.8 | 3.78 | 14.7 | 186 | 177 | 13.3 | 73.5 | 6.61 | 4.30 | 473 | 2.37 | 0.76 | 0.89 | 39.6 | 10.3 | 1.42 | 159 | 8.72 | 31.0 | 1.65 | 4.64 | 0.19 | 0.64 | 0.50 | 0.29 | 0.14 | 1.56 |
| LMR-Y1-2 | 17.0 | 3.07 | 4.50 | 4.22 | 16.6 | 190 | 241 | 21.5 | 139 | 12.7 | 6.83 | 904 | 4.40 | 1.18 | 0.97 | 30.0 | 16.9 | 1.94 | 242 | 10.7 | 31.6 | 2.30 | 6.52 | 0.35 | 0.75 | 0.59 | 0.46 | 0.12 | 1.33 |
| LMR-Y1-3 | 19.4 | 3.03 | 6.64 | 4.79 | 16.4 | 189 | 216 | 19.0 | 121 | 10.8 | 6.34 | 809 | 3.92 | 1.00 | 0.98 | 35.8 | 13.4 | 1.80 | 222 | 10.8 | 30.8 | 2.00 | 5.99 | 0.29 | 0.80 | 0.57 | 0.36 | 0.13 | 1.25 |
| BLGX granodiorite | BLGX-Y1-1 | 21.1 | 11.3 | 13.2 | 16.6 | 20.8 | 127 | 343 | 15.3 | 162 | 11.3 | 4.74 | 343 | 4.07 | 1.31 | 0.49 | 15.2 | 13.8 | 5.20 | 227 | 8.64 | 39.9 | 2.51 | 2.18 | 0.47 | 0.82 | 0.74 | 0.57 | 0.38 | 1.22 |
| BLGX-Y1-2 | 38.2 | 10.8 | 12.9 | 7.35 | 21.0 | 137 | 341 | 14.0 | 194 | 10.2 | 4.54 | 452 | 4.90 | 1.03 | 0.51 | 16.3 | 14.4 | 4.78 | 256 | 9.89 | 39.7 | 2.33 | 2.13 | 0.42 | 0.71 | 0.73 | 0.60 | 0.33 | 1.41 |
| BLGX-Y1-3 | 45.1 | 10.9 | 13.9 | 5.12 | 22.4 | 125 | 379 | 14.9 | 198 | 11.1 | 4.73 | 389 | 4.88 | 1.14 | 0.47 | 15.2 | 12.8 | 4.96 | 267 | 9.67 | 40.5 | 2.85 | 2.23 | 0.39 | 0.86 | 0.74 | 0.45 | 0.39 | 1.16 |
| BLGX-Y1-4 | 39.3 | 9.97 | 12.0 | 7.57 | 20.3 | 121 | 334 | 14.7 | 125 | 11.1 | 4.12 | 434 | 3.33 | 1.19 | 0.46 | 15.0 | 15.1 | 4.27 | 191 | 9.35 | 37.6 | 2.65 | 2.60 | 0.43 | 0.74 | 0.75 | 0.58 | 0.28 | 1.36 |
| BLGX-Y1-5 | 30.2 | 12.0 | 13.3 | 10.1 | 20.9 | 134 | 328 | 17.1 | 180 | 11.9 | 5.38 | 443 | 4.41 | 1.15 | 0.52 | 16.2 | 42.5 | 6.43 | 256 | 10.4 | 40.8 | 2.92 | 1.86 | 0.37 | 0.28 | 0.70 | 1.32 | 0.15 | 3.56 |
| KEQK diorite | KEQK-Y1-1 | 40.0 | * | * | * | 20.1 | 125 | 430 | 16.6 | 148 | 9.10 | 13.5 | 578 | 3.90 | 0.90 | 0.50 | * | 14.6 | 1.34 | 228 | 10.1 | 37.9 | * | 6.79 | 0.34 | 0.62 | 0.55 | 0.54 | 0.09 | 1.60 |
| KEQK-Y1-2 | 30.0 | * | * | * | 19.4 | 119 | 402 | 20.7 | 139 | 8.90 | 10.4 | 537 | 3.70 | 0.90 | 0.50 | * | 12.5 | 2.25 | 222 | 9.89 | 37.6 | * | 3.96 | 0.36 | 0.71 | 0.43 | 0.51 | 0.18 | 1.40 |
| KEQK-Y1-3 | 30.0 | * | * | * | 19.2 | 135 | 444 | 14.7 | 154 | 8.70 | 14.8 | 731 | 4.00 | 0.80 | 0.60 | * | 13.3 | 1.46 | 232 | 10.9 | 38.5 | * | 5.96 | 0.32 | 0.66 | 0.59 | 0.49 | 0.11 | 1.52 |
| KEQK diorite | DDKD-SE-Y1-1 | 44.0 | 10.6 | 1.00 | 12.8 | 17.8 | 76.7 | 318 | 17.3 | 167 | 6.91 | 1.36 | 599 | 4.34 | 0.37 | 0.52 | 12.3 | 10.7 | 2.19 | 246 | 18.5 | 38.4 | 4.49 | 3.15 | 0.22 | 0.65 | 0.40 | 0.33 | 0.21 | 1.55 |
| DDKD-SE-Y1-2 | 31.2 | 10.5 | 1.02 | 12.4 | 18.3 | 65.0 | 350 | 17.1 | 138 | 7.05 | 1.25 | 561 | 3.67 | 0.37 | 0.42 | 17.2 | 10.8 | 2.12 | 219 | 19.2 | 37.6 | 3.33 | 3.33 | 0.22 | 0.65 | 0.41 | 0.33 | 0.20 | 1.53 |
| DDKD-SE-Y1-3 | 49.5 | 13.4 | 12.6 | 16.7 | 19.3 | 92.0 | 323 | 17.8 | 135 | 7.29 | 1.58 | 618 | 3.75 | 0.38 | 0.60 | 22.5 | 11.1 | 2.16 | 221 | 19.4 | 36.1 | 2.71 | 3.37 | 0.21 | 0.66 | 0.41 | 0.32 | 0.19 | 1.53 |
| DDKD-SE-Y1-4 | 61.3 | 11.9 | 12.2 | 15.4 | 18.1 | 48.0 | 347 | 16.8 | 134 | 6.83 | 1.08 | 531 | 3.63 | 0.36 | 0.31 | 22.9 | 10.8 | 2.33 | 215 | 18.8 | 36.8 | 2.51 | 2.94 | 0.21 | 0.63 | 0.41 | 0.33 | 0.22 | 1.58 |
| BLGX diorite porphyry | BLGX-Y2-1 | 266 | 27.7 | 76.5 | 6.98 | 23.0 | 99.6 | 657 | 17.1 | 150 | 8.93 | 7.32 | 344 | 3.49 | 0.56 | 0.56 | 22.7 | 3.31 | 1.08 | 210 | 16.0 | 43.1 | 1.47 | 8.26 | 0.48 | 2.70 | 0.52 | 0.18 | 0.33 | 0.37 |
| BLGX-Y2-2 | 219 | 24.5 | 63.5 | 8.16 | 21.1 | 84.0 | 614 | 14.5 | 144 | 8.41 | 7.76 | 399 | 3.29 | 0.51 | 0.45 | 83.8 | 3.12 | 0.89 | 196 | 16.4 | 43.8 | 0.34 | 9.50 | 0.52 | 2.70 | 0.58 | 0.19 | 0.28 | 0.37 |
| BLGX-Y2-3 | 244 | 27.1 | 72.4 | 10.4 | 23.5 | 97.7 | 671 | 17.3 | 160 | 10.6 | 8.06 | 424 | 3.69 | 0.64 | 0.57 | 7.75 | 3.59 | 1.90 | 220 | 16.6 | 43.3 | 4.16 | 5.56 | 0.59 | 2.94 | 0.61 | 0.20 | 0.53 | 0.34 |
| BLGX-Y2-4 | 262 | 27.9 | 78.5 | 8.17 | 23.3 | 97.7 | 639 | 16.3 | 151 | 8.80 | 7.55 | 354 | 3.58 | 0.54 | 0.57 | 13.2 | 3.39 | 1.00 | 213 | 16.2 | 42.0 | 2.82 | 8.78 | 0.40 | 2.60 | 0.54 | 0.15 | 0.30 | 0.39 |
| BLGX-Y2-5 | 270 | 28.4 | 77.6 | 7.50 | 23.5 | 107 | 680 | 15.7 | 153 | 9.01 | 6.92 | 362 | 3.51 | 0.57 | 0.60 | 5.82 | 3.21 | 0.89 | 225 | 15.8 | 43.7 | 8.00 | 10.1 | 0.28 | 2.81 | 0.58 | 0.10 | 0.28 | 0.36 |
